# Supplementary material for: The valuation of the EQ-5D in Portugal
Source: Springer Nature journal article supplement (doi:10.1007/s11136-013-0448-z), 2013-06-07
Supplement: MOESM1 [file 279418]

Supplementary file A – Portuguese Population-Based Predicted Preference Weights for 243 EQ-5D Health States

| **State** | **Value** | **State** | **Value** | **State** | **Value** | **State** | **Value** | **State** | **Value** | **State** | **Value** |
| --- | --- | --- | --- | --- | --- | --- | --- | --- | --- | --- | --- |
| 11111 | 1,000 | 21132 | 0,392 | 13221 | 0,232 | 31222 | 0,101 | 13131 | -0,029 | 31311 | -0,179 |
| 11112 | 0,767 | 22122 | 0,390 | 22123 | 0,232 | 21323 | 0,100 | 23232 | -0,036 | 32232 | -0,179 |
| 11211 | 0,702 | 21123 | 0,389 | 21322 | 0,225 | 12331 | 0,091 | 23223 | -0,039 | 13313 | -0,180 |
| 21111 | 0,695 | 12131 | 0,380 | 23121 | 0,225 | 32211 | 0,090 | 32131 | -0,040 | 33123 | -0,180 |
| 11121 | 0,694 | 21311 | 0,372 | 12133 | 0,218 | 31213 | 0,086 | 13332 | -0,047 | 32223 | -0,182 |
| 11212 | 0,665 | 11321 | 0,371 | 22311 | 0,215 | 23222 | 0,086 | 23313 | -0,048 | 33221 | -0,188 |
| 21112 | 0,658 | 11113 | 0,368 | 12321 | 0,214 | 32121 | 0,083 | 31321 | -0,049 | 32313 | -0,191 |
| 11122 | 0,657 | 12213 | 0,348 | 11332 | 0,212 | 31132 | 0,081 | 13323 | -0,049 | 32321 | -0,206 |
| 12111 | 0,646 | 12132 | 0,343 | 31212 | 0,211 | 11313 | 0,079 | 31113 | -0,052 | 33111 | -0,216 |
| 12112 | 0,609 | 13211 | 0,342 | 21313 | 0,210 | 31123 | 0,078 | 22332 | -0,055 | 31133 | -0,217 |
| 21211 | 0,592 | 22113 | 0,341 | 11323 | 0,209 | 13232 | 0,073 | 32222 | -0,057 | 33222 | -0,225 |
| 11221 | 0,592 | 12123 | 0,341 | 13111 | 0,204 | 23213 | 0,071 | 22323 | -0,057 | 33312 | -0,234 |
| 21121 | 0,585 | 21312 | 0,335 | 31122 | 0,203 | 13223 | 0,070 | 23321 | -0,064 | 32233 | -0,237 |
| 21212 | 0,555 | 23111 | 0,335 | 23212 | 0,196 | 22322 | 0,068 | 32213 | -0,072 | 32322 | -0,243 |
| 11222 | 0,555 | 11322 | 0,334 | 13222 | 0,195 | 23132 | 0,066 | 32132 | -0,077 | 33231 | -0,243 |
| 21122 | 0,548 | 13121 | 0,334 | 32111 | 0,192 | 23123 | 0,063 | 33211 | -0,078 | 13331 | -0,250 |
| 12211 | 0,544 | 21231 | 0,326 | 23122 | 0,188 | 12332 | 0,054 | 31233 | -0,079 | 32331 | -0,262 |
| 22111 | 0,537 | 22221 | 0,325 | 13213 | 0,180 | 32212 | 0,053 | 32123 | -0,079 | 33233 | -0,271 |
| 12121 | 0,536 | 12311 | 0,324 | 22312 | 0,178 | 22313 | 0,053 | 13311 | -0,085 | 31313 | -0,274 |
| 12212 | 0,507 | 31112 | 0,313 | 12322 | 0,177 | 12323 | 0,052 | 31322 | -0,086 | 13333 | -0,278 |
| 11213 | 0,506 | 13212 | 0,305 | 13132 | 0,175 | 23311 | 0,046 | 33121 | -0,086 | 33232 | -0,280 |
| 11132 | 0,501 | 23112 | 0,298 | 23113 | 0,173 | 32122 | 0,046 | 11333 | -0,086 | 33223 | -0,283 |
| 22112 | 0,500 | 13122 | 0,297 | 13123 | 0,172 | 13321 | 0,045 | 23233 | -0,094 | 32333 | -0,289 |
| 21113 | 0,499 | 11131 | 0,297 | 22231 | 0,169 | 21333 | 0,045 | 32311 | -0,096 | 32332 | -0,299 |
| 12122 | 0,499 | 21232 | 0,289 | 21233 | 0,164 | 13113 | 0,042 | 23322 | -0,101 | 32323 | -0,301 |
| 11123 | 0,498 | 22222 | 0,288 | 12313 | 0,162 | 32113 | 0,031 | 22333 | -0,113 | 33321 | -0,307 |
| 21221 | 0,482 | 21223 | 0,287 | 32112 | 0,156 | 31312 | 0,024 | 33212 | -0,115 | 33113 | -0,311 |
| 12113 | 0,451 | 12312 | 0,287 | 21331 | 0,140 | 31231 | 0,015 | 23331 | -0,119 | 33332 | -0,333 |
| 21222 | 0,446 | 12231 | 0,278 | 31221 | 0,138 | 13233 | 0,015 | 33122 | -0,123 | 33323 | -0,335 |
| 11312 | 0,444 | 11233 | 0,274 | 11133 | 0,135 | 23312 | 0,009 | 31131 | -0,123 | 33322 | -0,344 |
| 11231 | 0,435 | 22131 | 0,271 | 22232 | 0,132 | 13322 | 0,008 | 13133 | -0,123 | 31331 | -0,344 |
| 22211 | 0,435 | 21133 | 0,267 | 22223 | 0,129 | 11331 | 0,008 | 32312 | -0,133 | 31333 | -0,372 |
| 12221 | 0,434 | 21321 | 0,262 | 23221 | 0,123 | 23133 | 0,008 | 32133 | -0,135 | 33131 | -0,381 |
| 21131 | 0,428 | 31211 | 0,248 | 13312 | 0,118 | 22233 | 0,007 | 31332 | -0,141 | 33133 | -0,409 |
| 22121 | 0,427 | 11311 | 0,241 | 12233 | 0,116 | 23231 | 0,000 | 32231 | -0,142 | 33311 | -0,438 |
| 13112 | 0,407 | 12232 | 0,241 | 31111 | 0,110 | 12333 | -0,004 | 31323 | -0,143 | 33313 | -0,465 |
| 11232 | 0,398 | 31121 | 0,240 | 13231 | 0,110 | 33112 | -0,013 | 23333 | -0,147 | 33333 | -0,496 |
| 22212 | 0,398 | 22213 | 0,239 | 22133 | 0,109 | 22331 | -0,018 | 23332 | -0,156 | 33331 | -0,536 |
| 21213 | 0,397 | 12223 | 0,238 | 22321 | 0,105 | 32221 | -0,020 | 23323 | -0,158 |  |  |
| 12222 | 0,397 | 22132 | 0,234 | 21332 | 0,103 | 31232 | -0,022 | 33213 | -0,173 |  |  |
| 11223 | 0,396 | 23211 | 0,233 | 23131 | 0,103 | 31223 | -0,024 | 33132 | -0,178 |  |  |
