# Supplementary material for: The valuation of the EQ-5D in Portugal
Source: Springer Nature journal article supplement (doi:10.1007/s11136-013-0448-z), 2013-06-07
Supplement: MOESM2 [file 279418]

Supplementary file B – SPSS syntax for the Portuguese EQ-5D 3L value set

*Generate Dummy Variables for Levels 2 and 3 of Five Dimensions*

COMPUTE m1 = 0 .

COMPUTE m2 = 0 .

COMPUTE s1 = 0 .

COMPUTE s2 = 0 .

COMPUTE u1 = 0 .

COMPUTE u2 = 0 .

COMPUTE p1 = 0 .

COMPUTE p2 = 0 .

COMPUTE a1 = 0 .

COMPUTE a2 = 0 .

IF (MO = 2) m1 = 1 .

IF (MO = 3) m2 = 1 .

IF (SC = 2) s1 = 1 .

IF (SC = 3) s2 = 1 .

IF (UA = 2) u1 = 1 .

IF (UA = 3) u2 = 1 .

IF (PD = 2) p1 = 1 .

IF (PD = 3) p2 = 1 .

IF (AD = 2) a1 = 1 .

IF (AD = 3) a2 = 1 .

*Generate Interaction Terms (I2, I2-squared, I3, I3-squared)*

COMPUTE m0 = 0 .

COMPUTE s0 = 0 .

COMPUTE u0 = 0 .

COMPUTE p0 = 0 .

COMPUTE a0 = 0 .

IF (m1 = 0 & m2 = 0) m0 = 1 .

IF (s1 = 0 & s2 = 0) s0 = 1 .

IF (u1 = 0 & u2 = 0) u0 = 1 .

IF (p1 = 0 & p2 = 0) p0 = 1 .

IF (a1 = 0 & a2 = 0) a0 = 1 .

COMPUTE i2 = m1 + s1 + u1 + p1 + a1 .

COMPUTE i2 = i2 - 1 .

IF (i2 < 0) i2 = 0 .

COMPUTE i22 = i2*i2.

COMPUTE i3= m2 + s2 + u2 + p2 + a2 .

COMPUTE i3 = i3 - 1 .

IF (i3 < 0) i3 = 0 .

COMPUTE i32 = i3*i3.

*Generate D1 Term*

COMPUTE i1 = m0 + s0 + u0 + p0 + a0 .

COMPUTE d1 = 4 - i1 .

IF (d1 < 0) d1 = 0 .

*Generate Raw Index Score *

IF ((MO = 1 | MO = 2 | MO = 3 ) & (SC = 1 | SC = 2 | SC = 3 ) & (UA = 1 | UA = 2 | UA = 3 ) & (PD = 1 | PD = 2 | PD = 3 ) & (AD = 1 | AD = 2 | AD = 3 ))

pred = .30543*m1 + .89017*m2 + .35397*s1 + .79608*s2 + .29849*u1 + .75906*u2 + .30633*p1 + .70274*p2 + .23328*a1 + .63208*a2

+ -.43663*d1 + .24028*i2 + -.03358*i32.

*Generate EQ-5D (D1) Index Score*

COMPUTE EQ5D = 1 - pred .

IF (i1 = 5) EQ5D = 1 .

EXECUTE .

VARIABLE LABELS EQ5D 'EQ_5D Pt tariff (D1 model)'.

EXECUTE .

*Drop Variables Generated by Program*

DELETE VARIABLES m1 m2 s1 s2 u1 u2 p1 p2 a1 a2 m0 s0 u0 p0 a0 i1 i2 i22 i3 i32 d1 pred .

EXECUTE .
